# Supplementary material for: Field of Genes: An Investigation of Sports-Related Genetic Testing
Source: J Pers Med. 2012 Sep 12;2(3):119–37. doi: 10.3390/jpm2030119 (PMC4251368; doi:10.3390/jpm2030119)
Supplement: Supplementary File 1 — PDF-Document (PDF, 99 KB) [file jpm-02-00119-s001.pdf]

**Supplementary Table 1.** Website features relevant to consumer understanding of sports-related DNA products.

| Company                                                                  | Website Readability<br>(Flesh-Kincaid Grade Level) |               |              | Literacy Tools |                 |          | Website Navigation Tools |                                                                                                                                                |                                                                                                                                               |
|--------------------------------------------------------------------------|----------------------------------------------------|---------------|--------------|----------------|-----------------|----------|--------------------------|------------------------------------------------------------------------------------------------------------------------------------------------|-----------------------------------------------------------------------------------------------------------------------------------------------|
|                                                                          | Home Page                                          | Purchase Page | Product Page | Glossary       | Video Tutorials | FAQ Page | Search Bar               | Header Tab Titles                                                                                                                              | Footer Tab Titles                                                                                                                             |
| 23andMe, Inc.                                                            | 8.9                                                | 10.5          | 10.5         | Yes            | Yes*            | Yes      | Yes                      | welcome; ancestry; health; how it works; store (also login; register your kit; blog; help; cart)                                               | Blog; About us; Jobs; 23andMe; Terms of Service; Privacy Statement; Consent Document                                                          |
| Advanced Health Care Inc., India                                         | 12.9                                               | 12.1          | 12.1         |                |                 | Yes      |                          | Home; About us; DNA Testing Services; Fee Schedule/Payment; Sample Collection; Bank Details; FAQ; Request Info; Site Map; Contact Us; E-Client | None                                                                                                                                          |
| American International Biotechnology Services (AIBiotech; SportsXFactor) | 11.9                                               | 9.4           | 12.4         |                |                 |          |                          | Home; Test Information; Order; About Us; Contact Us                                                                                            | Privacy Policy; Legal Notice                                                                                                                  |
| Asper Bio Tech                                                           | 17.1                                               | 12.2          | 13.8         |                |                 |          | Yes                      | About AsperBiotech; Genetic Tests; Ordering; Science; Fp7 Projects; Media Center; Partnership; Genetics; Athletic Gene Test                    | None                                                                                                                                          |
| Athleticode, Inc.                                                        | 11                                                 | 8.8           | 10.3         |                |                 |          |                          | Home; How It Works; What we Offer; Get Started (also About Us; Contact Us; Register Your Kit; Log in)                                          | None                                                                                                                                          |
| Atlas Sports Genetics, LLC                                               | 10.8                                               | 12.4          | 6.1          |                |                 |          | Yes                      | Home; Products; Information; Contact Us; My Account; Shopping Cart                                                                             | Home; Privacy Policy; Conditions of Use; Disclaimer; Links                                                                                    |
| Cosmetics DNA                                                            | 14                                                 | 9.6           | 9.6          | Yes            |                 | Yes      |                          | Home; Products; Q&A; Our Quality; Your Privacy; Career; Contact                                                                                | Home; Products; DNA Test Sample; Your Derma Genes; Q&A; About Us; About our Quality; Catalogue; Glossary; Consult Us; Career; Contacts; Links |

**Supplementary Table 1. *cont.***

|                                                 |              |              |              |              |              |              |              |                                                                                                                             |                                                                                                                                                                   |
|-------------------------------------------------|--------------|--------------|--------------|--------------|--------------|--------------|--------------|-----------------------------------------------------------------------------------------------------------------------------|-------------------------------------------------------------------------------------------------------------------------------------------------------------------|
| <b>CyGene Direct</b>                            | 11.8         | 13.3         | 13.3         |              |              | Yes          |              | Home; Blog; RSS; Login; About CyGene; Contact; Espanol; Russian; Resource Center; Genetic Testing; For Professionals; Shop  | Home; Blog; RSS; Login; About CyGene; Contact; Espanol; Russian                                                                                                   |
| <b>DNA4U</b>                                    | 8.7          | 12.7         | 12.7         | Yes          |              | Yes          |              | Home; DNA Tests; About Us; Knowledge Base; FAQ; Contact                                                                     | Terms of Use; Privacy Policy; Security; Contact Us                                                                                                                |
| <b>Family Tree DNA</b>                          | 10.9         | 12.8         | 9.3          | Yes          | Yes*         | Yes          | Yes          | Home; Products; Projects; Testimonials; FAQ; About; Feedback                                                                | Home; Products; Projects; Testimonials; FAQ; About; Login; Careers; Privacy; Sitemap; Contact Us                                                                  |
| <b>Genetic Technologies Limited</b>             | 13.1         | 10.9         | 10.9         |              |              |              | Yes          | medical, forensics, paternity, personal, animal                                                                             | links, contact us, disclaimer, terms and conditions, privacy, sitemap                                                                                             |
| <b>My Gene</b>                                  | 10.1         | 11.7         | 13           |              |              | Yes          | Yes          | Home; About Us; Genetic Tests; Products; Information; Contact Us; Terms (Also View Your Results; Medical Section; and FAQs) | About us; FAQs; Ordering; Contact us; Sport; Weight Loss; Coeliac; Statin; Lactose; MyGene Medical; Terms & Conditions; Your Privacy; Returns & Refunds; Delivery |
| <b>Warrior Roots</b>                            | 8.9          | 10.3         | 9.4          |              |              | Yes          |              | Home; Warrior; Athlete; Store; About; Contact                                                                               | None                                                                                                                                                              |
| <b>(Number of Companies)</b>                    | <b>(3**)</b> | <b>(1**)</b> | <b>(1**)</b> | <b>(4)</b>   | <b>(2*)</b>  | <b>(8)</b>   | <b>(6)</b>   | <b>(13)</b>                                                                                                                 | <b>(9)</b>                                                                                                                                                        |
| <b>Proportion of Industry Providing Feature</b> | <b>23.1%</b> | <b>7.7%</b>  | <b>7.7%</b>  | <b>30.8%</b> | <b>15.4%</b> | <b>61.5%</b> | <b>46.2%</b> | <b>100%</b>                                                                                                                 | <b>69.2%</b>                                                                                                                                                      |

\* Video Tutorials are offered by company but not video tutorials specific to the sports-related DNA product.

\*\*A company was considered to meet readability requirements if it provided the information at an 8<sup>th</sup> Grade Reading Level, which included any scores not exceeding 8.99.
